# Supplementary material for: Understanding Host–Virus Interactions: Assessment of Innate Immune Responses in Mastomys natalensis Cells after Arenavirus Infection
Source: MDPI journal article supplement (doi:10.3390/v14091986), 2022-09-08
Supplement: s1 [file s1]

Table S1. Master mix set-up for the RT-PCR.

| Mix | Gene  | Fwd Primer             | Rev Primer             | Probe                        | Flouorochrome | Quencher |
|-----|-------|------------------------|------------------------|------------------------------|---------------|----------|
| 1   | IFIT2 | CTCCTGGCCCTAAACAGTTAC  | CCTTGTCTTCACGCTTCATTG  | TCCACCTTCGGTATGGCAACTTTCAG   | Cy5           | BHQ-2    |
|     | OAS1b | GAGTGAAGTTTGAGGTCCAGAG | GCTGTAGATGCTAACCTGTCC  | TGTGCTTCCAGCCTTTGATGTCCT     | JOE           | BHQ-1    |
|     | ADAR1 | CTGCCCCGTGACTATGACTTAG | TTGCTGATCCAGTTCCCATAG  | CCCATATCCCGAAGGCTTTTCTTGAAGT | TxRed         | BHQ-2    |
|     | 60S   | GATGAATACCAACCCCTCTCG  | ATCCCATCCAACACCTTGAG   | ACCCTATCACTTCCGAGCCCC        | FAM           | BHQ-1    |
| 2   | ZAP   | AGAGGCACTGTCATGTTTCG   | GACAAAGACGGAGGGATTTCAG | CCCGAGTCCTGGTTGGAAATGTCA     | Cy5           | BHQ-2    |
|     | OAS2  | AGCAGAAACATGAGTGGGAAG  | CATTATAGGCGGGAAGGACATC | CGAACTCAACACTTTCATCGAGCGTCT  | JOE           | BHQ-1    |
|     | IRF7  | TGGAAAATAGGGAAGAGGTGAC | GTCCCCAGCATCACTAGAAAG  | CTCCAAACCCCAAGCCCTCTGC       | TxRed         | BHQ-2    |
|     | Ppil4 | GTGGGAGACTTACCTGATGC   | CTCATCTGTGGTCACTGGATTC | ACACAAACAGCACATTTTCTGGAGGC   | FAM           | BHQ-1    |
| 3   | PKR   | CATAAGCTGGTAGAGAAAGGCC | ACTGGGAAGCACTGTTACTTG  | AGCTAAAGGATGCCCGGACGTT       | TxRed         | BHQ-2    |
|     | Ppil4 | GTGGGAGACTTACCTGATGC   | CTCATCTGTGGTCACTGGATTC | ACACAAACAGCACATTTTCTGGAGGC   | FAM           | BHQ-1    |
| 4   | IF27B | TTGGTTGCTGTGGAGAGTC    | CTTCACTGGAACAGGCATTG   | AGACATCATCTTGGCTGCTATGGATGC  | JOE           | BHQ-1    |
| 5   | IRF1  | CAAACCTCCGTTGTGCCATG   | TGCCCTTGTTCTTGCTCTG    | TCCTTCACTTCCTCGATGTCCGGT     | JOE           | BHQ-1    |
|     | 60S   | GATGAATACCAACCCCTCTCG  | ATCCCATCCAACACCTTGAG   | ACCCTATCACTTCCGAGCCCC        | FAM           | BHQ-1    |
| 6   | ISG20 | ATTATAGAACCCAAGTCAGCGG | AGTCGTGCTTCAGGTCATG    | TGTGGCCCTCACCATGTGCT         | Cy5           | BHQ-2    |
|     | MxA   | CTCAAAAGGAGTGGACTAGCC  | TGTCTCCCAATGTTCTTCTG   | CCAGAGATGAGCCAGCACCTGAAT     | JOE           | BHQ-1    |
|     | MxB   | CTCACTGGTAGAAAGGGAAGTC | CAGGTCAATCAGAGTCAGGTC  | CCGGCAATCAAGTTCTGGGCTTT      | FAM           | BHQ-1    |

**Table S2. Changes in ISG expression of MasKECs after stimulation with IFN- $\alpha$  or IFN- $\beta$ .**

| Gene          | IFN- $\alpha$ |             |             |              | IFN- $\beta$ |             |             |              |
|---------------|---------------|-------------|-------------|--------------|--------------|-------------|-------------|--------------|
|               | 50<br>U/mL    | 100<br>U/mL | 500<br>U/mL | 1000<br>U/mL | 50<br>U/mL   | 100<br>U/mL | 500<br>U/mL | 1000<br>U/mL |
| <b>ADAR1</b>  | 2.0           | 0.8         | 1.2         | 1.3          | 2.0          | 2.2         | 2.2         | 2.5          |
| <b>IF27B</b>  | 62083.3       | 29738.4     | 23542.6     | 5.7          | 111.9        | 129.4       | 122.3       | 10.9         |
| <b>IFIT2</b>  | 8.8           | 4.5         | 15.5        | 15.9         | 4.7          | 5.6         | 13.6        | 15.4         |
| <b>IRF1*</b>  | 215.3         | 96.4        | 110.6       | 0.7          | 1.9          | 1.5         | 1.5         | 1.1          |
| <b>IRF7</b>   | 68.7          | 33.7        | 51.9        | 75.7         | 102372.1     | 118873.5    | 187968.8    | 263955.0     |
| <b>ISG20*</b> | 474.8         | 215.8       | 340.5       | #            | 1.4          | 1.8         | 3.2         | 4.0          |
| <b>MxA*</b>   | 357.9         | 667.1       | 6216.2      | #            | 5.5          | 48.3        | 937.9       | 2331.9       |
| <b>MxB*</b>   | 373.6         | 995.3       | 11390.1     | 14112.2      | 1.2          | 115.1       | 1758.6      | 3925.9       |
| <b>OAS1b*</b> | 44082.8       | 41127.4     | 70105.6     | 92307.2      | 149.7        | 4716.9      | 48532.9     | 94513.6      |
| <b>OAS2*</b>  | 4797.4        | 19866.1     | 9548.6      | 7063.1       | 39302.9      | 55152.0     | 135798.1    | 188177.5     |
| <b>PKR</b>    | 10.9          | 5.0         | 6.0         | 6.5          | 3749773.0    | 3.8         | 5.2         | 6.0          |
| <b>ZAP</b>    | 2.5           | 1.2         | 1.5         | 1.4          | 1.4          | 1.8         | 2.8         | 3.1          |

# no Ct values were obtained for neither the experimental nor control-treated cells.

\* if no signal Ct value for the controls was obtained due to too low concentrations in unstimulated cells. The previously determined cut-off Ct-values (Table 1) were used for the calculation of the fold change of ISG expression of these genes.

**Table S3. Changes in ISG expression of MΦ after stimulation with IFN-α, IFN-β or Poly(I:C).**

| Gene               |            |             |             |              | IFN-α      |             |             |              | IFN-β |      |        |         | Poly(I:C) |  |  |  |  |
|--------------------|------------|-------------|-------------|--------------|------------|-------------|-------------|--------------|-------|------|--------|---------|-----------|--|--|--|--|
| Concen-<br>tration | 50<br>U/mL | 100<br>U/mL | 500<br>U/mL | 1000<br>U/mL | 50<br>U/mL | 100<br>U/mL | 500<br>U/mL | 1000<br>U/mL | 2 h   | 4 h  | 6.5 h  | 16 h    | 24 h      |  |  |  |  |
| ADAR1              | 2.4        | 2.8         | 2.9         | 3.2          | 3.3        | 2.2         | 3.3         | 2.8          | 3.9   | 9.8  | 23.2   | 12.8    | 15.4      |  |  |  |  |
| IF27B*             | 17518.2    | 17562.4     | 25161.2     | 2909.2       | 14269.7    | 13796.7     | 23815.0     | 19140.9      | #     | #    | #      | 195.8   | 194.3     |  |  |  |  |
| IFIT2              | 46.6       | 65.0        | 113.8       | 260.5        | 60.2       | 55.4        | 140.9       | 189.3        | 1.7   | 28.1 | 287.5  | 219.7   | 249.9     |  |  |  |  |
| IRF1               | 1.6        | 1.6         | 3.1         | 3.3          | 2.0        | 1.6         | 3.4         | 3.5          | 0.9   | 3.1  | 8.2    | 2.6     | 3.0       |  |  |  |  |
| IRF7*              | 56.1       | 62.0        | 75.5        | 466.3        | 72.5       | 35.8        | 100.6       | 114.2        | 3.4   | 32.5 | 237.7  | 513.7   | 625.4     |  |  |  |  |
| ISG20              | 1.0        | 0.4         | 1.0         | 0.0          | 0.1        | 0.1         | 0.3         | 0.2          | 0.9   | 1.6  | 4.1    | 0.4     | 0.1       |  |  |  |  |
| MxA                | 365.4      | 348.8       | 1012.9      | 2616.1       | 397.1      | 391.2       | 898.2       | 1263.4       | 0.2   | 1.5  | 165.7  | 453.7   | 445.0     |  |  |  |  |
| MxB                | 311.3      | 284.6       | 795.6       | 2269.6       | 108.6      | 116.8       | 267.1       | 373.2        | 1.7   | 7.0  | 779.7  | 2426.1  | 2334.9    |  |  |  |  |
| OAS1b*             | 541958.8   | 677514.8    | 673174.3    | 159830.9     | 766420.8   | 364571.5    | 539006.2    | 313659.8     | #     | #    | #      | 19392.4 | 24197.9   |  |  |  |  |
| OAS2*              | 115.5      | 127.0       | 155.5       | 316.9        | 141.8      | 69.2        | 165.4       | 170.0        | 24.0  | 12.7 | 1250.0 | 8157.9  | 9648.5    |  |  |  |  |
| PKR                | 5.5        | 5.6         | 1.1         | 11.1         | 8.5        | 7.1         | 6.1         | 14239266.9   | 0.6   | 2.1  | 10.7   | 6.6     | 6.0       |  |  |  |  |
| ZAP                | 2.2        | 2.3         | 1.7         | 1.2          | 2.7        | 23346521.0  | 2.6         | 2.0          | 2.1   | 1.8  | 6.3    | 2.1     | 2.7       |  |  |  |  |

# no Ct values were obtained for neither the experimental nor control-treated cells and a calculation of the fold change of expression was not feasible.

\* if no signal Ct value for the controls was obtained due to too low concentrations in unstimulated cells. The previously determined cut-off Ct-values (Table 1) were used for the calculation of the fold change of ISG expression of these genes.

**Table S4. Changes in ISG expression of MΦ after infection with MORV, MOBV, LASV, RVFV or CHIKV.**

| Gene   | MORV        |             | MOBV        |             | LASV        |             | RVFV        | CHIKV       |
|--------|-------------|-------------|-------------|-------------|-------------|-------------|-------------|-------------|
| Time   | 24 h. p. i. | 48 h. p. i. | 24 h. p. i. | 48 h. p. i. | 24 h. p. i. | 48 h. p. i. | 24 h. p. i. | 24 h. p. i. |
| ADAR1  | 1.9         | 1.4         | 2.5         | 1.8         | 1.2         | 0.9         | 6.6         | 3.2         |
| IF27B* | #           | #           | 0.7         | 0.5         | 1.0         | 0.5         | 56705.5     | 9743.5      |
| IFIT2  | 20.9        | 15.7        | 93.2        | 34.6        | 12.7        | 14.0        | 1516.9      | 451.8       |
| IRF1*  | 1.0         | 0.7         | 1012.3      | 1021.6      | 172.8       | 630.8       | 8.8         | 1670.3      |
| IRF7   | 35.9        | 26.6        | 1161.2      | 1199.4      | 5.6         | 4.6         | 2010.6      | 5939.2      |
| ISG20  | 2.5         | 1.4         | #           | #           | #           | #           | 24.9        | 3.8         |
| MxA*   | 555.4       | 272.6       | 5.8         | 6.6         | 11.7        | 3.3         | 15470.5     | 32882.6     |
| MxB*   | 6823.1      | 6321.7      | 784.4       | 810.4       | 174.8       | 159.6       | 856902.2    | 46602.7     |
| OAS1b* | #           | #           | #           | 1873.5      | #           | #           | 675954.8    | 83768.2     |
| OAS2   | 907.6       | 746.2       | 15907.0     | 32843.2     | 31.0        | 24.5        | 3071.8      | 113327.5    |
| PKR    | 2.6         | 1.8         | #           | #           | #           | #           | 21.7        | 12.2        |
| ZAP    | 2.0         | 1.2         | 3.4         | 0.4         | 1.9         | 1.1         | 5.6         | 0.7         |

# no Ct values were obtained for neither the experimental nor control-treated cells and a calculation of the fold change of expression was not feasible.

\* if no signal Ct value for the controls was obtained due to too low concentrations in unstimulated cells. The previously determined cut-off Ct-values (Table 1) were used for the calculation of the fold change of ISG expression of these genes.

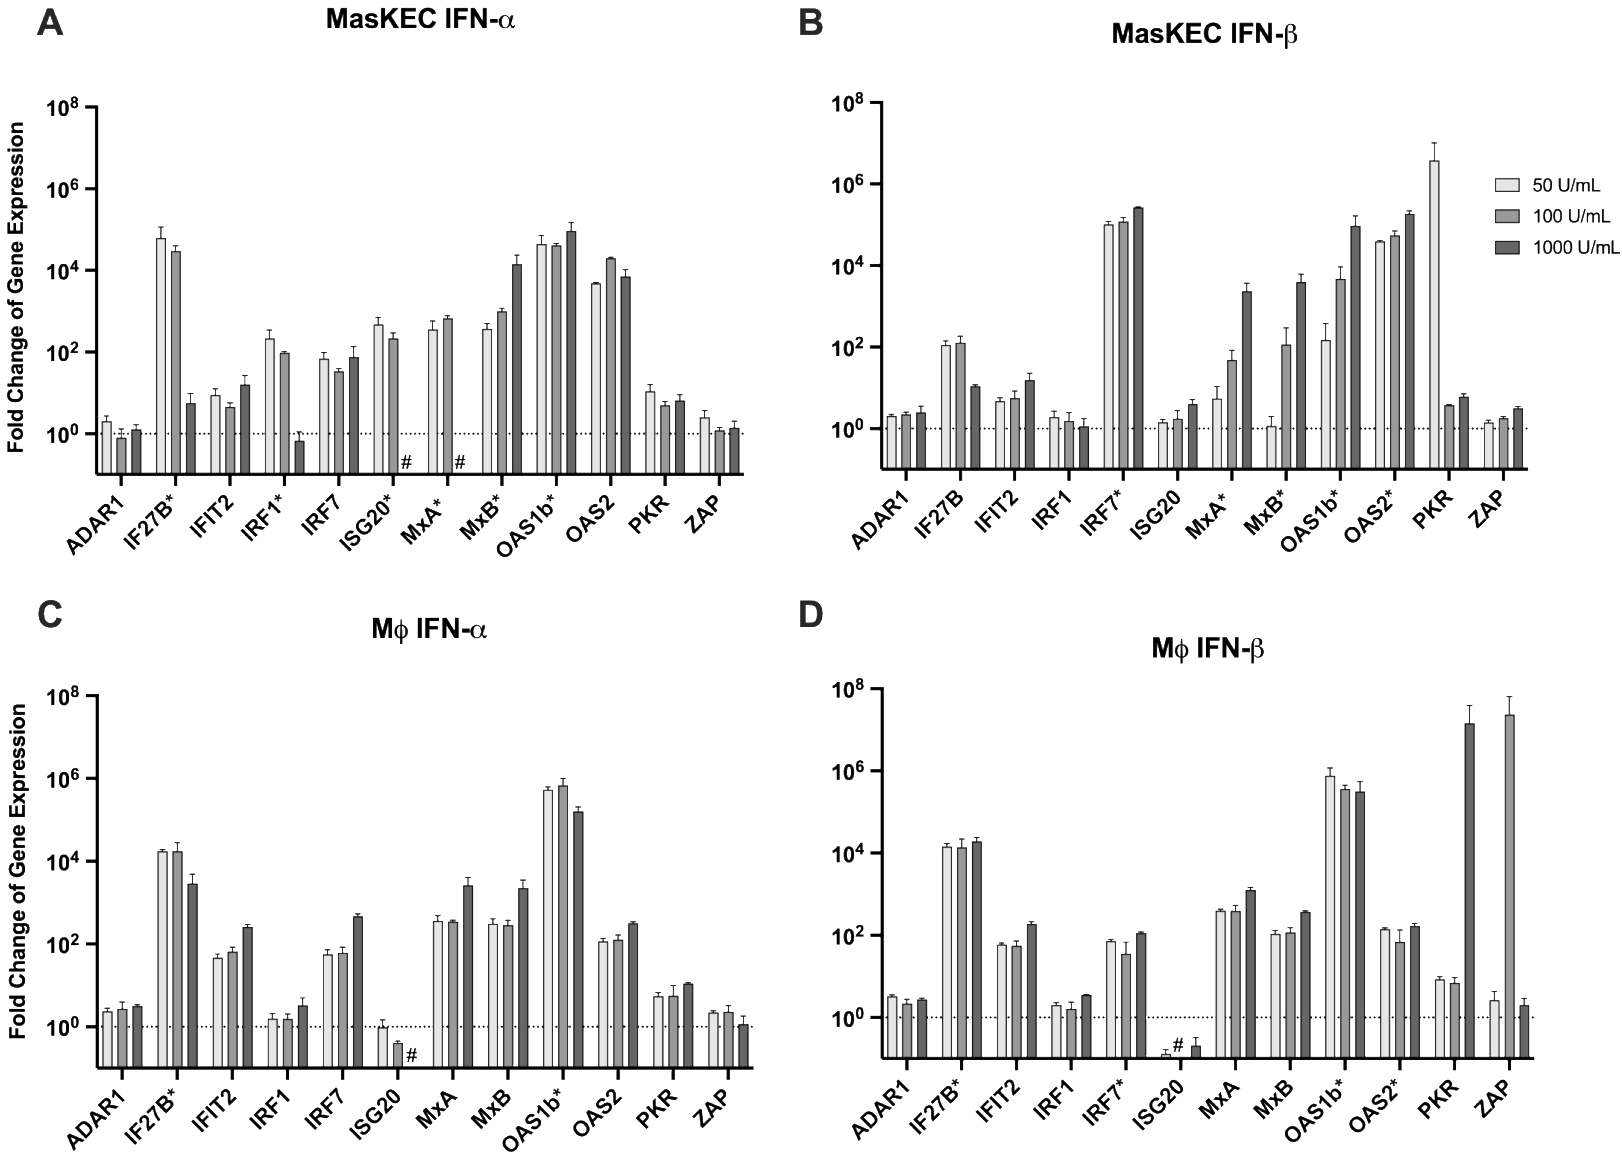

**Figure S1. Changes in ISG expression after stimulation with IFN- $\alpha$  or IFN- $\beta$ .** MasKECs (A & B) or M $\Phi$  (C & D) were stimulated for 16 h with 50, 100, or 1000 U/mL IFN- $\alpha$  (A & C) or IFN- $\beta$  (B & D). Cells without stimulation were used for later normalization. Cellular RNA was harvested, depleted of DNA and used for RT-PCR analysis of ISG expression levels. For the RT-PCR-based assays, 10 ng of overall extracted RNA was used. Normalization was done with the  $\Delta\Delta C_t$  method with the housekeeping gene *Ppil4*. Genes were marked with an asterisk (\*) if no signal  $C_t$  value for the controls was obtained due to too low concentrations in unstimulated cells. The previously determined cut-off  $C_t$ -values (Table 2) were used for the calculation of the fold change of ISG expression of these genes. (#) No  $C_t$  values were obtained for neither the experimental nor control treated cells and a calculation of the fold change of expression was not feasible. The dashed line indicates the ISG level of untreated control cells. The experiment was done in triplicates and depicted are the mean and standard deviation.

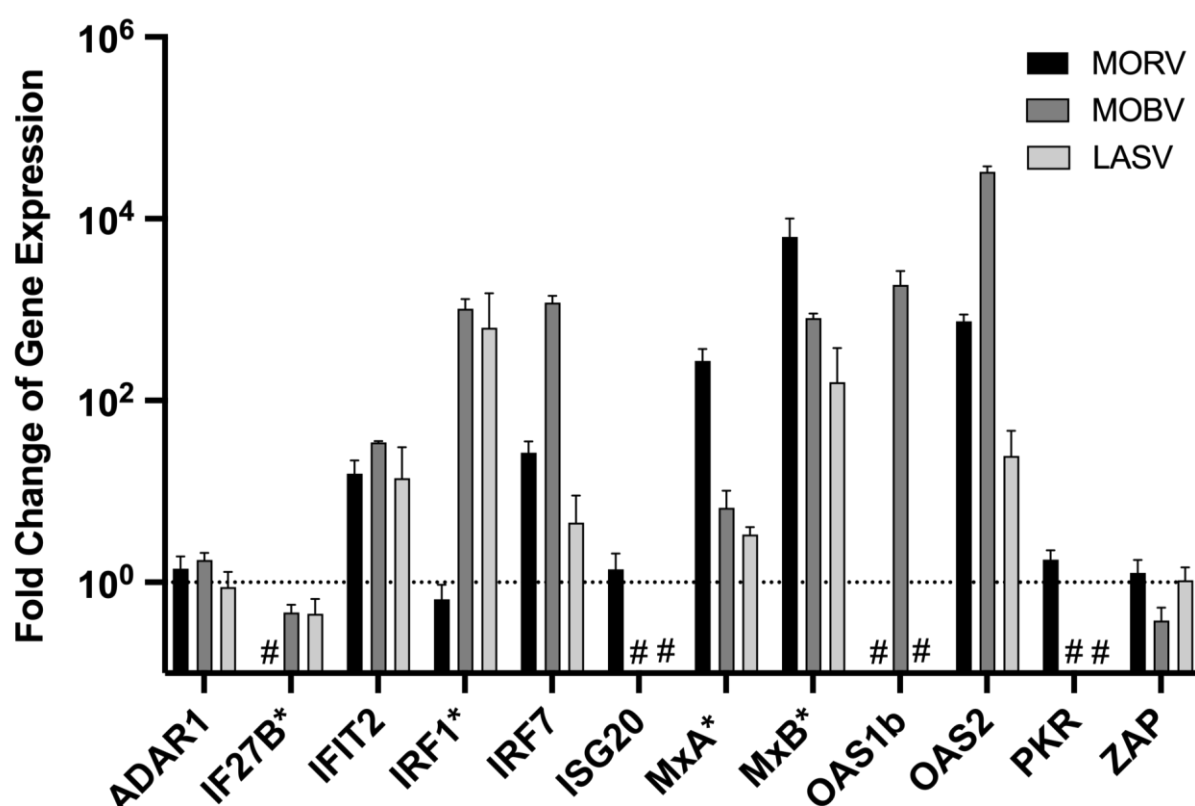

**Figure S2. Changes in ISG expression after infection with different arenaviruses.** MΦ infected with either MORV, MOBV, or LASV with a MOI of 1 and incubated for 48 h. RNA was isolated and depleted of DNA. For the RT-PCR-based assays, 10 ng of overall extracted RNA was used. Normalization was done with the  $\Delta\Delta C_t$  method with the housekeeping gene *Ppil4*. Genes were marked with an asterisk (\*) if no signal  $C_t$ -value for the controls was obtained due to too low concentrations in uninfected cells. The previously determined cut-off  $C_t$ -values (Table 2) were used for the calculation of the fold change of ISG expression of these genes. (#) no  $C_t$  values were obtained for neither the experimental nor control treated cells and a calculation of the fold change of expression was not feasible. The dashed line indicates the regular ISG level of untreated control cells. The experiment was done in triplicates and depicted are the mean and standard deviation.

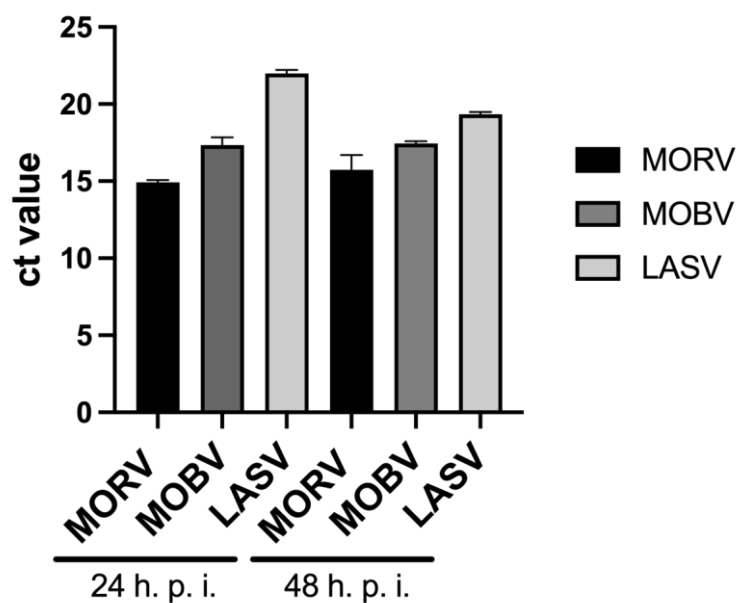

**Figure S3. Confirmation of efficient infection with arenaviruses.** Mean with standard deviation of all Ct values obtained by using the Altona RealStar® Lassa Virus RT-PCR Kit 2.0. The previously isolated RNA from all infection experiments with arenaviruses was used for the confirmation of efficient infection experiments.
